# Supplementary material
Source: MDPI journal article supplement (https://www.mdpi.com/2071-1050/14/15/9529)
Supplement: s1 [file s1]

## Supplementary Files

**Table S1: Effect of selected pesticides (ekalux, impala and neemstar) on changes in blood parameter in *M. keletius* exposed for 0-28 days**

| PESTICIDE                                |          | 7 Days        |               | 14 Days       |               | 21 Days       |               | 28 Days       |               |
|------------------------------------------|----------|---------------|---------------|---------------|---------------|---------------|---------------|---------------|---------------|
|                                          |          | CONTROL       | TEST          | CONTROL       | TEST          | CONTROL       | TEST          | CONTROL       | TEST          |
| <b>RBC</b><br>(million/mm <sup>3</sup> ) | EKALUX   | 1.47 ± 0.069  | 1.43 ± 0.037  | 1.52 ± 0.042  | 1.37± 0.070   | 1.55 ± 0.034  | 1.29± 0.106   | 1.61± 0.073   | 1.18± 0.044   |
|                                          | IMPALA   | 1.42 ± 0.096  | 1.36± 0.030   | 1.45± 0.088   | 1.30 ± 0.096  | 1.49± 0.030   | 1.22± 0.065   | 1.56 ± 0.034  | 1.10 ± 0.151  |
|                                          | NEEMSTAR | 1.59 ± 0.090  | 1.48 ± 0.051  | 1.62± 0.030   | 1.39± 0.035   | 1.66 ± 0.090  | 1.30± 0.056   | 1.68± 0.019   | 1.20± 0.055   |
| <b>WBC</b><br>(10 <sup>6</sup> )         | EKALUX   | 16.70 ± 0.076 | 17.65± 0.013  | 16.75 ± 0.077 | 18.42± 0.199  | 16.80± 0.080  | 18.69± 0.061  | 16.58± 0.044  | 19.33± 0.011  |
|                                          | IMPALA   | 16.60 ± 0.106 | 18.20 ± 0.077 | 16.65± 0.069  | 18.80 ± 0.051 | 16.72± 0.056  | 19.95± 0.054  | 16.79± 0.078  | 22.54 ± 0.051 |
|                                          | NEEMSTAR | 16.56± 0.089  | 17.88± 0.086  | 16.70 ± 0.096 | 17.91± 0.164  | 16.75± 0.133  | 17.98 ± 0.096 | 16.77± 0.055  | 18.27± 0.099  |
| <b>Hb</b><br>(g/dl)                      | EKALUX   | 8.23± 0.030   | 6.59 ± 0.051  | 8.34± 0.030   | 3.74± 0.066   | 8.56± 0.030   | 2.34± 0.056   | 8.57± 0.077   | 2.00± 0.026   |
|                                          | IMPALA   | 6.10 ± 0.049  | 4.03± 0.079   | 6.15± 0.044   | 3.50 ± 0.096  | 6.22± 0.105   | 2.00± 0.098   | 6.24± 0.051   | 1.65± 0.106   |
|                                          | NEEMSTAR | 7.92± 0.057   | 6.73 ± 0.096  | 7.98± 0.034   | 4.24 ± 0.051  | 8.03 ± 0.063  | 3.90 ± 0.096  | 8.09± 0.099   | 2.75± 0.077   |
| <b>Hc</b><br>(%)                         | EKALUX   | 34.42± 0.111  | 32.75± 0.015  | 34.46 ± 0.063 | 28.15± 0.095  | 34.52± 0.045  | 26.45± 0.030  | 34.58± 0.091  | 22.68± 0.049  |
|                                          | IMPALA   | 33.41 ± 0.063 | 30.96± 0.135  | 33.46 ± 0.034 | 29.55± 0.051  | 33.15 ± 0.077 | 23.48± 0.106  | 33.54 ± 0.051 | 19.85± 0.091  |
|                                          | NEEMSTAR | 36.35± 0.034  | 34.20 ± 0.096 | 36.39± 0.065  | 32.41 ± 0.096 | 36.43± 0.070  | 30.75± 0.035  | 36.47± 0.067  | 25.12 ± 0.034 |
| <b>MCV</b><br>(cμ)                       | EKALUX   | 78.92 ± 0.090 | 78.24± 0.045  | 78.94± 0.056  | 77.27± 0.099  | 78.97± 0.047  | 76.07± 0.090  | 79.02± 0.033  | 73.46± 0.025  |
|                                          | IMPALA   | 78.15± 0.074  | 77.95± 0.049  | 78.19± 0.035  | 76.24± 0.034  | 78.23± 0.089  | 74.80± 0.075  | 78.29± 0.043  | 70.32 ± 0.063 |
|                                          | NEEMSTAR | 79.47± 0.015  | 79.10± 0.030  | 79.53 ± 0.077 | 78.47 ± 0.051 | 79.59± 0.069  | 77.52± 0.106  | 79.62± 0.099  | 76.70 ± 0.096 |
| <b>MCH</b><br>(μg)                       | EKALUX   | 25.99± 0.043  | 25.59± 0.070  | 26.04± 0.065  | 25.08± 0.026  | 26.09 ± 0.051 | 24.34 ± 0.096 | 26.11± 0.049  | 19.67± 0.033  |
|                                          | IMPALA   | 25.29 ± 0.044 | 23.66± 0.086  | 25.33 ± 0.090 | 22.94± 0.087  | 25.38± 0.059  | 21.96± 0.028  | 25.42± 0.097  | 17.39± 0.106  |
|                                          | NEEMSTAR | 26.49± 0.088  | 26.17± 0.056  | 26.52± 0.095  | 25.97 ± 0.096 | 26.59± 0.039  | 25.55± 0.037  | 26.63± 0.088  | 21.32± 0.056  |
| <b>MCHC</b><br>(%)                       | EKALUX   | 32.89± 0.034  | 32.52± 0.044  | 32.93± 0.030  | 32.02± 0.066  | 32.98± 0.041  | 31.46 ± 0.056 | 33.03± 0.069  | 23.39 ± 0.077 |
|                                          | IMPALA   | 32.37± 0.089  | 30.36± 0.092  | 32.41± 0.030  | 30.01± 0.091  | 32.48 ± 0.063 | 29.36± 0.043  | 32.55 ± 0.034 | 20.29± 0.087  |
|                                          | NEEMSTAR | 33.33 ± 0.034 | 33.02± 0.093  | 33.36± 0.019  | 32.84 ± 0.034 | 33.41± 0.049  | 32.56± 0.070  | 33.49± 0.099  | 27.50 ± 0.077 |

*All the values are average of triplicates ± SD; All the data are significant at p<0.05 level; All experiments were carried out at 28°C ± 1°C.*

Table S2: Effect of Ekalux, Impala and Neemstar on activity of respiratory enzymes (mg reduced TTC/g/wet wt/h) in tissues of *M. keletius*

| Pesticide | Tissue | Activity of respiratory enzymes (mg reduced TTC/g/wet wt/h) |                     |       |                      |       |                      |       |                      |       |
|-----------|--------|-------------------------------------------------------------|---------------------|-------|----------------------|-------|----------------------|-------|----------------------|-------|
|           |        | ENZYME                                                      | 7 <sup>th</sup> Day |       | 14 <sup>th</sup> Day |       | 21 <sup>st</sup> Day |       | 28 <sup>th</sup> Day |       |
|           |        |                                                             | CONTROL             | TEST  | CONTROL              | TEST  | CONTROL              | TEST  | CONTROL              | TEST  |
| Ekalux    | Brain  | SDH                                                         | 0.762               | 0.500 | 0.767                | 0.470 | 0.772                | 0.460 | 0.779                | 0.441 |
|           |        | MDH                                                         | 1.128               | 0.959 | 1.136                | 0.859 | 1.147                | 0.741 | 1.159                | 0.633 |
|           |        | GDH                                                         | 0.584               | 0.813 | 0.589                | 0.835 | 0.592                | 1.069 | 0.596                | 1.196 |
|           | Gill   | SDH                                                         | 1.428               | 1.314 | 1.429                | 1.169 | 1.436                | 1.054 | 1.440                | 0.815 |
|           |        | MDH                                                         | 1.038               | 0.902 | 1.045                | 0.861 | 1.050                | 0.726 | 1.053                | 0.611 |
|           |        | GDH                                                         | 0.722               | 0.885 | 0.721                | 1.079 | 0.730                | 1.132 | 0.813                | 1.712 |
|           | Liver  | SDH                                                         | 2.175               | 2.129 | 2.180                | 2.045 | 2.186                | 1.733 | 2.191                | 1.226 |
|           |        | MDH                                                         | 1.169               | 0.912 | 1.174                | 0.877 | 1.778                | 0.723 | 1.786                | 0.589 |
|           |        | GDH                                                         | 1.089               | 1.473 | 1.093                | 1.986 | 0.982                | 2.378 | 1.104                | 2.814 |
|           | Muscle | SDH                                                         | 1.760               | 1.625 | 1.767                | 1.432 | 1.772                | 1.326 | 1.778                | 1.022 |
|           |        | MDH                                                         | 1.146               | 0.852 | 1.157                | 0.621 | 1.165                | 0.428 | 1.172                | 0.221 |
|           |        | GDH                                                         | 0.818               | 1.339 | 0.822                | 1.468 | 0.829                | 1.796 | 0.835                | 1.966 |
| Impala    | Brain  | SDH                                                         | 0.725               | 0.424 | 0.713                | 0.368 | 0.732                | 0.340 | 0.738                | 0.320 |
|           |        | MDH                                                         | 1.110               | 0.915 | 1.110                | 0.810 | 1.118                | 0.705 | 1.124                | 0.658 |
|           |        | GDH                                                         | 0.596               | 0.810 | 0.592                | 0.850 | 0.614                | 1.078 | 0.619                | 1.400 |
|           | Gill   | SDH                                                         | 1.290               | 0.908 | 1.296                | 0.864 | 1.382                | 0.724 | 1.510                | 0.558 |
|           |        | MDH                                                         | 1.038               | 0.836 | 1.045                | 0.720 | 1.072                | 0.690 | 1.078                | 0.490 |
|           |        | GDH                                                         | 0.720               | 1.092 | 0.728                | 1.115 | 0.768                | 1.545 | 0.798                | 1.765 |
|           | Liver  | SDH                                                         | 1.170               | 1.424 | 1.168                | 0.910 | 1.183                | 0.835 | 1.197                | 0.765 |
|           |        | MDH                                                         | 1.168               | 0.780 | 1.172                | 0.652 | 1.178                | 0.560 | 1.185                | 0.342 |
|           |        | GDH                                                         | 1.098               | 1.580 | 1.095                | 2.126 | 1.162                | 2.558 | 1.194                | 2.925 |
|           | Muscle | SDH                                                         | 1.765               | 1.405 | 1.776                | 0.895 | 1.179                | 0.808 | 1.832                | 0.684 |
|           |        | MDH                                                         | 1.146               | 0.856 | 1.158                | 0.725 | 1.165                | 0.624 | 1.174                | 0.440 |
|           |        | GDH                                                         | 0.816               | 1.432 | 0.833                | 1.676 | 0.897                | 2.046 | 0.915                | 2.154 |
| Neemstar  | Brain  | SDH                                                         | 0.724               | 0.620 | 0.712                | 0.570 | 0.728                | 0.545 | 0.732                | 0.516 |
|           |        | MDH                                                         | 1.125               | 0.980 | 1.112                | 0.890 | 1.128                | 0.736 | 1.138                | 0.570 |
|           |        | GDH                                                         | 0.595               | 0.765 | 0.592                | 0.820 | 0.598                | 1.040 | 0.612                | 1.185 |
|           | Gill   | SDH                                                         | 1.435               | 1.395 | 1.428                | 1.310 | 1.439                | 1.200 | 1.445                | 0.985 |
|           |        | MDH                                                         | 1.038               | 0.936 | 1.035                | 0.830 | 1.039                | 0.724 | 1.043                | 0.590 |
|           |        | GDH                                                         | 0.720               | 0.845 | 0.728                | 0.975 | 0.745                | 1.040 | 0.812                | 1.410 |
|           | Liver  | SDH                                                         | 2.170               | 2.115 | 2.162                | 2.090 | 2.242                | 1.758 | 2.257                | 1.438 |
|           |        | MDH                                                         | 1.168               | 0.985 | 1.189                | 0.780 | 1.235                | 0.552 | 1.254                | 0.342 |
|           |        | GDH                                                         | 1.098               | 1.372 | 1.112                | 1.710 | 1.153                | 2.040 | 1.176                | 2.700 |
|           | Muscle | SDH                                                         | 1.762               | 1.686 | 1.732                | 1.545 | 1.831                | 1.368 | 1.846                | 1.205 |
|           |        | MDH                                                         | 1.146               | 0.856 | 1.148                | 0.624 | 1.153                | 0.445 | 1.255                | 0.280 |
|           |        | GDH                                                         | 0.816               | 1.336 | 0.767                | 1.420 | 0.819                | 1.450 | 0.845                | 1.555 |

All the values are average of triplicates  $\pm$  SD; All the data are significant at  $p < 0.05$  level; All experiments were carried out at  $28^\circ\text{C} \pm 1^\circ\text{C}$ .
